# Supplementary material for: High-precision magnesium isotope analysis of carbonates by laser ablation MC-ICP-MS using wet and dry conditions
Source: Royal Society of Chemistry journal article supplement (doi:10.1039/d2ja00163b), 2022-01-01
Supplement: d2ja00163b1.xlsx [file d2ja00163b1.xlsx]

## Sheet: Appendix Table 1
	Appendix Table 1. Major and trace element compositions of carbonate materials.
			MGS-4(n=5)					DOL-4(n=5)					DOL-7(n=5)					SD-6(n=3)
			min	max	mean	2SD		min	max	mean	2SD		min	max	mean	2SD		min	max	mean	2SD
	Mg	%	24.1386	28.0245	26.1514	3.28612		2.91695	3.5507	3.22453	0.53192		4.98324	6.13944	5.49998	0.999208		2.64852	4.28347	3.39257	1.65462
	Ca	%	0.184121	5.88209	2.82376	4.77543		21.4115	22.1795	21.7929	0.699216		22.308	23.6331	23.1838	1.08789		0.0541846	0.176421	0.105694	0.126688
	Fe	%	0	0.0533679	0.0401599	0.045324		7.13011	10.0206	8.9878	2.26096		7.22334	9.49899	8.88717	1.87759		38.4812	42.3415	40.5615	3.89513
	Mn	%	0	0.00355124	0.00168292	0.0032106		5.20132	7.62956	6.73509	1.92756		0.723164	2.12308	1.3224	1.06453		1.00787	1.91742	1.45708	0.909754
	B	µg g-1	3.83924	12.2242	9.53887	6.63659		2.29274	8.759	3.98829	5.43551		2.39505	3.03711	2.63067	0.494643		2.0523	2.36503	2.22925	0.320758
	Na	µg g-1	n.d.	156.158	86.927	159.876		n.d.	384.911	89.3023	332.305		54.9093	372.414	148.481	262.817		0	8.68017	3.07361	9.72588
	Al	µg g-1	n.d.	56.7831	20.6684	50.2883		2.15673	6.46125	3.77666	3.61478		78.9933	632.968	239.172	453.723		25.4716	41.733	31.8137	17.4018
	K	µg g-1	n.d.	22.8787	9.78883	20.9071		n.d.	100.199	22.0344	87.4976		1.09733	12.4036	7.28701	9.29241		n.d.	5.38983	2.63659	5.39361
	Ti	µg g-1	n.d.	2.7472	0.592711	2.41607		n.d.	0.285508	0.0950453	0.268961		1.07488	12.6514	4.81625	9.37622		0.18722	0.640611	0.417614	0.453572
	V	µg g-1	n.d.	0.462858	0.287985	0.431965		0.104228	0.406099	0.217361	0.240911		12.8731	52.7142	27.0945	31.4904		0.609274	2.32684	1.32556	1.78709
	Cr	µg g-1	n.d.	1.02782	0.340436	0.862405		n.d.	0.552298	0.189989	0.531673		n.d.	0.341955	0.14974	0.297612		0.0556401	0.870277	0.413146	0.832711
	Co	µg g-1	n.d.	0.231052	0.0753149	0.18371		n.d.	0.152841	0.0643589	0.118172		9.44755	19.266	12.9927	7.49803		0.0673328	1.91219	0.684756	2.12599
	Ni	µg g-1	n.d.	1.52957	0.710444	1.28144		0.1577	0.757279	0.434746	0.504027		1.12539	12.2496	5.46767	9.38162		0.836244	22.6997	8.64042	24.4006
	Zn	µg g-1	1.0457	3.71745	2.28456	2.18212		226.325	477.206	386.639	201.166		342.964	1153.55	648.404	680.434		5.01938	64.0929	29.4853	61.6299
	Sr	µg g-1	4.06476	753.211	234.862	604.712		45.4869	60.6457	53.2883	12.8031		61.4657	184.979	143.572	95.6117		0.0204758	0.162513	0.0826743	0.145287
	Y	µg g-1	n.d.	0.0378321	0.0162517	0.0361004		0.523405	5.02338	2.47999	3.49215		8.81828	91.5015	42.4957	75.0782		1.45003	1.92501	1.73614	0.50395
	Ba	µg g-1	0.929208	59.7385	39.0874	45.2724		0.230517	0.560653	0.416719	0.267657		2.07564	5.72138	3.45168	2.77963		n.d.	0.0271764	0.0137265	0.0271806
	La	µg g-1	n.d.	0.209578	0.0908296	0.171805		1.56859	4.17091	2.52875	2.01994		5.60712	33.7087	18.0612	25.3538		n.d.	n.d.	n.d.	n.d.
	Ce	µg g-1	0.0400095	0.353361	0.179533	0.262278		1.98123	5.26428	2.84125	2.76545		7.84027	54.1288	28.2864	42.7822		n.d.	0.00570182	n.d.	0.00586614
	Pr	µg g-1	n.d.	0.0814976	0.0289283	0.0643482		0.342789	0.999403	0.500069	0.564965		0.928052	7.11159	3.63397	5.81789		n.d.	n.d.	n.d.	n.d.
	Nd	µg g-1	n.d.	0.19229	0.0828271	0.190582		1.13291	4.0767	1.97693	2.39385		4.06754	31.7297	16.6203	26.832		n.d.	n.d.	n.d.	n.d.
	Sm	µg g-1	n.d.	0.045414	0.0111366	0.0386849		0.0914198	0.646422	0.325713	0.412094		1.03109	11.1835	5.37116	9.83301		n.d.	0.0348379	0.0140347	0.0367575
	Eu	µg g-1	n.d.	0.0144875	0.00516372	0.0128116		0.064593	0.147474	0.0993412	0.0612834		1.13246	9.54379	4.94466	8.05647		0.00595123	0.0273288	0.0149231	0.0221894
	Gd	µg g-1	n.d.	0.0218345	0.00541573	0.0189102		0.102979	0.455286	0.344688	0.29826		1.36487	16.0939	7.62507	14.2016		0.0515287	0.173244	0.113483	0.121774
	Tb	µg g-1	n.d.	n.d.	n.d.	n.d.		0.00947716	0.062329	0.0433168	0.042604		0.20432	3.02064	1.3318	2.62891		0.0175054	0.0253619	0.0220848	0.00817401
	Dy	µg g-1	n.d.	n.d.	n.d.	n.d.		0.0660068	0.545987	0.301528	0.356644		1.43481	17.4199	7.62571	14.7845		0.214689	0.296155	0.24822	0.0851999
	Ho	µg g-1	n.d.	0.00524321	n.d.	n.d.		0.0134526	0.104294	0.0531351	0.0661142		0.21157	2.85587	1.2615	2.41444		0.053024	0.0684846	0.0624624	0.0165541
	Er	µg g-1	n.d.	0.00934626	n.d.	0.00831535		0.0186184	0.275198	0.143481	0.186023		0.508225	6.73176	3.02711	5.7444		0.139347	0.252998	0.190005	0.115642
	Tm	µg g-1	n.d.	n.d.	n.d.	n.d.		n.d.	0.0315144	0.0192475	0.0254734		0.0675309	0.861521	0.38053	0.732312		0.0178168	0.0439008	0.0284539	0.027382
	Yb	µg g-1	n.d.	0.0306747	0.0116124	0.0256396		n.d.	0.203144	0.102912	0.14346		0.382784	5.01384	2.23994	4.32051		0.0972198	0.303315	0.16709	0.235975
	Lu	µg g-1	n.d.	0.00602137	n.d.	n.d.		n.d.	0.0226114	0.0121405	0.0166529		0.0464454	0.717682	0.305443	0.595155		0.0116803	0.0330245	0.0190244	0.0242586
	notes: "n.d." represents those under detection limits.
	Method
	Major and trace element concentrations for all investigated carbonate samples were carried out with a RESOlution 193 nm laser system attached to an iCAP-Q ICP-MS at the State Key Laboratory of Geological Processes and Mineral Resources (GPMR), China University of Geosciences in Wuhan. NIST SRM 612 and USGS reference glasses (BIR-1G, BCR-2G and BHVO-2G) were repeatedly analyzed for each 7-10 unkno…
	Y. Liu, Z. Hu, S. Gao, D. Günther, J. Xu, C. Gao and H. Chen, Chem. Geol., 2008, 257, 34-43.

## Sheet: Appendix Table 2
	Appendix Table 2. SN-MC-ICP-MS Mg isotope measurements (‰) of carbonates
	Sample	SN-MC-ICP-MS
		δ26Mg	2SD	δ25Mg	2SD	n
	MGS-1	0.61	0.05	0.33	0.04	3
	MGS-3	−0.90	0.05	−0.45	0.04	3
	MGS-2	−0.70	0.05	−0.35	0.04	3
	MGS-4	0.17	0.05	0.1	0.04	3
	DOL-3	−2.47	0.05	−1.29	0.04	3
	DOL-4	−4.48	0.05	−2.31	0.04	3
	DOL-7	−1.50	0.05	−0.77	0.04	3
	DOL-8	−1.35	0.05	−0.70	0.04	3
	DOL-9	−0.68	0.05	−0.33	0.04	3
	SD-1	−2.16	0.05	−1.10	0.04	3
	SD-2	−1.98	0.05	−1.02	0.04	3
	SD-5	−2.15	0.05	−1.12	0.04	3
	SD-6	−1.64	0.05	−0.85	0.04	3
